# Supplementary material
Source: Springer Nature journal article supplement (https://www.springermedizin.de/resource/supplementary/12978_2013_208_MOESM1_ESM.pdf/9602248)

**No response**

**4.50%**

**After two year**

**33.00%**

**No never**

**40.50%**

**With in two years**

**4.50%**

**With in three months**

**17.50%**

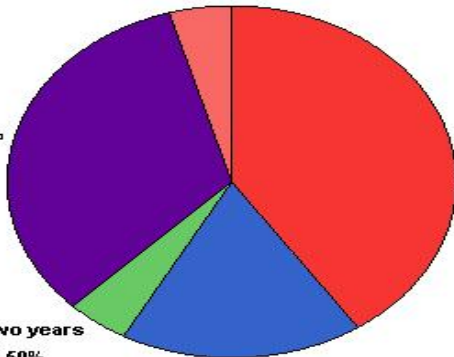

Supplement: MOESM1 [file 9602248]
